# Supplementary material for: Stacked graphene nanofibers for electrochemical oxidation of DNA bases
Source: Royal Society of Chemistry journal article supplement (doi:10.1039/c0cp00213e), 2010-01-01
Supplement: c0cp00213e.pdf [file c0cp00213e.pdf]

## Electronic Supplementary Information

### Stacked graphene nanofibers for electrochemical oxidation of DNA bases

Adriano Ambrosi<sup>b</sup>, Martin Pumera<sup>\*a</sup>

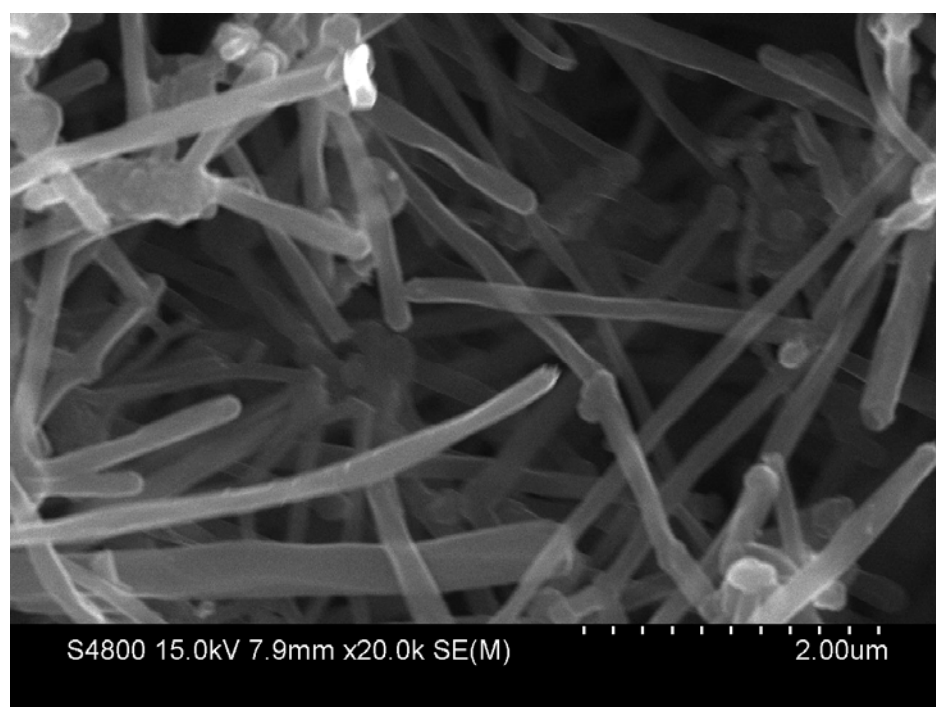

Figure S1: SEM image of acid washed MWCNTs.
